# Supplementary material for: Histone Demethylase UTX Regulates Glioblastoma Progression Through Affecting Periostin Expression
Source: Research Square preprint supplement (doi:10.21203/rs.3.rs-1299845/v1), 2022-02-01
Supplement: Supplementary file 1 [file 21ae527451f8565ab938d38c.docx]

**Supplementary Table S4 CHIP-qPCR primers used during the study**

| **Symbol** | **Forward** | **Reverse** |
| --- | --- | --- |
| POSTN | GCGCATTGATAAGCCTTGTGT | TCCCTTGTGGAAGCTAGAGT |
| ECSCR | GGCAATGGGGAGTCAAGGAA | GGTCTTCAAAGCACACTCGC |
| ARL14 | CTGCCAGGTTGGCTATAGGTT | GCTGGGTGTCTTCAGCAACT |
| VCAM1 | AGCCCAAGAGATTTGCCACT | TGCTGCCAAAACAAGGGAAAC |
| COL1A2 | CCCCCTTTGCGATGACTTCT | GCATTCCAGGCCCTAGGTTT |
| COL3A1 | CAAGAAAGCACTCTGGCTTGC | CAAGAAAGCACTCTGGCTTGC |
| COL6A3 | TCGTTTCCACCACAACCTCC | CACTGGGAGCCGAGTAACAC |
| ITGBL1 | TGCATACCTGTCCCCAGTCT | TACCCCAATCTCCACCCTGT |
| COL1A1 | ACGTCGAAGCCGAATTCCT | CCATAGTGCCCTCTCTCCATC |
| EREG | GTTTCAATGCAAGGAGGGCG | GTGGGTGGTTTTGGTTGCTC |
| ADAMTS2 | GCTGGTGAGTACGCACTTCT | GGAGCACGAGGCTCACTAAA |
| TRIML2 | TTCACCAATGCCAATGCCAG | GACCCTCCCAAATTGCCTCT |
| SERPINB5 | CTGATTCGGCTGGAAGGGAG | ACGCAGCTCTGCTCTGAAAT |
| IL7R | GAGAGCCACTGTGAATCAAGC | ACTCCCCCAAACCTGAATGC |
| DIO2 | TTATAGGGAAACACCCGGAGC | CAGCAAAGGAAATCCGGCAA |
| STC2 | TCAGCAACGCAGGAGAATGT | TGTAAACCGTGGCTGTCTCC |
| ADAMTS15 | CCCATGCCCCTGTCCTATTG | GAAGACCCTTCACTGACCCG |
| AKR1B10 | TGACTCCAATCAGGTCGGGA | CCCTGTGATGGTTTCCTCTGT |
| MRGPRX4 | ATCATCGGGTCCAAAGCCCT | GAGAGAAACAGAGGCTCGCA |
| C5orf46 | CCAAACGCTGGTCACAACAG | TTACCACAGTCGCAAGGACC |
| MYORG | GCAGGGCAAGCACAATTAAA | AGGCTCAGGGATCTGCTATTC |
| PTHLH | TCTCTTTTTGTGGAGGAGAGGA | AGTCCAAGGTACCTAGCCAAG |
| DGKI | GAAGTGGGGTCCCCTACGA | CGTTCCTGACCGAGAAGCCTG |
| MPP4 | AATCTCCCCTGCTACCCCAT | TGCAACATTTCTGACCCCCT |
| CPA4 | CCCAGGGTCACACAAAGAATGA | TTTTCCCCTCACTCCACCTGA |
